# Supplementary material for: Mitochondrial Heteroplasmy and PCR Amplification Bias Lead to Wrong Species Delimitation with High Confidence in the South American and Antarctic Marine Bivalve Aequiyoldia eightsii Species Complex
Source: MDPI journal article supplement (doi:10.3390/genes14040935), 2023-04-18

## Supplementary Materials - S1

**Table S1. Annotation of 18 kb- mitochondrial transcript.** Annotation of 18 kbp transcript (TRINITY\_DN0\_c0\_g1\_i6) using MITOS (Bernt et al. 2013). Above: The table provides the name of the mitochondrial gene annotated, the start and stop position, the direction of the strand and the length of the gene. Below: Mapping of genes on 18kb transcript (red: protein coding gene, green: rRNA gene, blue: tRNA gene)

| Name       | Start | Stop  | Strand | Length |
|------------|-------|-------|--------|--------|
| nad3       | 1283  | 1615  | +      | 333    |
| trnG(gga)  | 1654  | 1716  | +      | 63     |
| nad2       | 1777  | 2604  | +      | 828    |
| cox1       | 2890  | 4368  | +      | 1479   |
| nad6       | 4625  | 5107  | +      | 483    |
| trnK(aaa)  | 5155  | 5222  | +      | 68     |
| trnL1(cta) | 5226  | 5291  | +      | 66     |
| trnE(gaa)  | 5317  | 5385  | +      | 69     |
| trnY(tac)  | 5390  | 5454  | +      | 65     |
| trnF(ttc)  | 5463  | 5528  | +      | 66     |
| trnH(cac)  | 5555  | 5623  | +      | 69     |
| rrnS       | 5653  | 6587  | +      | 935    |
| rrnL       | 6571  | 7935  | +      | 1365   |
| trnM(atg)  | 7946  | 8014  | +      | 69     |
| trnP(cca)  | 8020  | 8085  | +      | 66     |
| nad5       | 8126  | 9769  | +      | 1644   |
| trnM(atg)  | 9794  | 9861  | +      | 68     |
| trnS1(aga) | 9877  | 9937  | +      | 61     |
| trnT(aca)  | 9951  | 10019 | +      | 69     |
| cox3       | 10142 | 10888 | +      | 747    |
| nad1       | 10990 | 11871 | +      | 882    |
| atp6       | 12176 | 12625 | +      | 450    |
| nad4l      | 12731 | 12964 | +      | 234    |
| nad4       | 13082 | 14290 | +      | 1209   |
| trnN(aac)  | 14322 | 14389 | +      | 68     |
| cob        | 14445 | 15527 | +      | 1083   |
| cox2       | 15646 | 16293 | +      | 648    |
| trnQ(caa)  | 16328 | 16396 | +      | 69     |
| trnS2(tca) | 16401 | 16463 | +      | 63     |
| trnW(tga)  | 16482 | 16550 | +      | 69     |
| trnA(gca)  | 16562 | 16629 | +      | 68     |
| trnL2(tta) | 16842 | 16907 | +      | 66     |
| trnR(cga)  | 17045 | 17114 | +      | 70     |
| trnV(gta)  | 17139 | 17206 | +      | 68     |

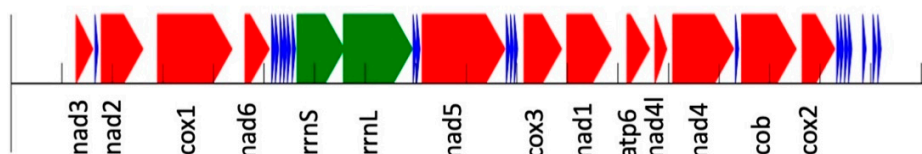

**Table S2. COI p-distance.** p-distances based on *COI* between the most frequent haplotypes of *Aequiyoldia* found in Punta Arenas, Potter Cove and Hangar Cove.

|    | h1  | h2  | h3  | h4 |
|----|-----|-----|-----|----|
| h1 | *   |     |     |    |
| h2 | 0.8 | *   |     |    |
| h3 | 6.1 | 5.9 | *   |    |
| h4 | 7.0 | 6.6 | 8.6 | *  |

**Figure S1. Shell length of *Aequiyoldia*.** Box plot of Shell length of *Aequiyoldia eightsii* based on locations (Antarctica and South America) (left) and mitotypes (right). Box plot based on location includes all the animals collected and measured, while the boxplot based on mitotypes includes only those animals analyzed with haplotype-specific primers. The thick line indicates the median, the box represents the first and third quartile, and whiskers the 95 % confidence interval

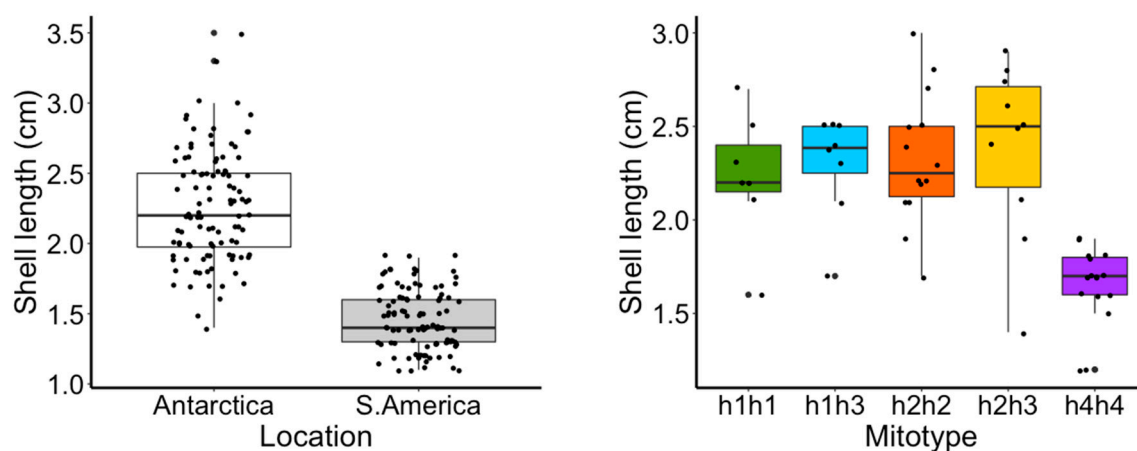

Supplement: s1 [file s1]
